# Supplementary material
Source: PubMed Central journal article supplement (PMC11028074)
Supplement: 262_2018_2249_MOESM1_ESM.pdf [file 262_2018_2249_MOESM1_ESM.pdf]

**Supplementary videos – Time-lapse microscopy of neutrophils interaction with tumor cells.**

Holomonitor<sup>tm</sup> time-lapse microscopy showing neutrophils (smaller cells) purified from 4T1 tumor-bearing mice in co-culture with control 4T1 tumor cells (Part 1), TRPM2kd 4T1 cells (Part 2) and CXCL2 overexpressing TRPM2kd cells (Part 3). Images were taken every 2 minutes for 2 hours.
